# Supplementary material for: High selectivity of CO2 capture with single- and double-walled carbon nanotubes
Source: Royal Society of Chemistry journal article supplement (doi:10.1039/d4en00496e), 2024-11-29
Supplement: d4en00496e1.pdf [file d4en00496e1.pdf]

## Supplementary Information:

# High Selectivity of CO<sub>2</sub> Capture with Single- and Double-Walled Carbon Nanotubes

Winarto,<sup>a,\*</sup> Lilis Yuliati,<sup>a</sup> Purnami,<sup>a</sup> Paul E. Brumby,<sup>b</sup> and Kenji Yasuoka<sup>b</sup>

<sup>a</sup> Department of Mechanical Engineering, Faculty of Engineering, Brawijaya University,  
Jl. MT Haryono 167, Malang 65145, Indonesia

<sup>b</sup> Department of Mechanical Engineering, Keio University, 3-14-1 Hiyoshi, Kohoku-ku,  
Yokohama 223-8522, Japan

\*E-mail: winarto@ub.ac.id

Figure S1 shows the MD simulation result for a system consisting of (8, 8) SWCNT and a mixture of N<sub>2</sub> – O<sub>2</sub> in the reservoir. The mole fraction of the mixture is 0.5. As presented in Figure S1, the number of O<sub>2</sub> molecule in the CNT is higher than that of N<sub>2</sub> molecule. The result indicates that the CNT preferentially adsorbs O<sub>2</sub> instead of N<sub>2</sub>. Using the data after 2 ns, the average mole fraction of O<sub>2</sub> in the CNT is 0.69. This means that the selectivity of  $S_{O_2/N_2}$  is 2.2.

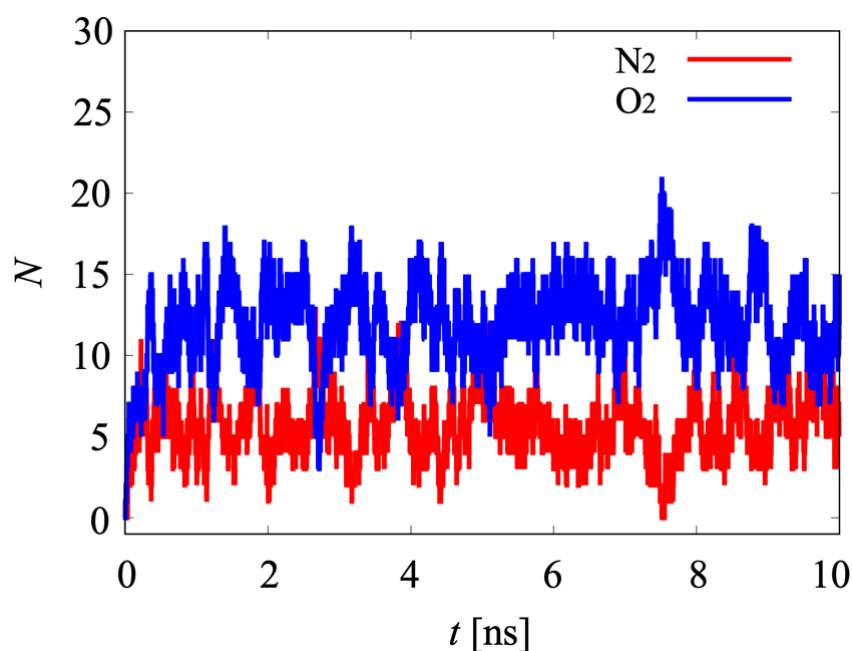

**Figure S1** MD simulation with (8, 8) SWCNT and a N<sub>2</sub> – O<sub>2</sub> binary mixture in the reservoir. The vertical axis represents the number of molecules ( $N$ ) inside the SWCNT.

Figure S2 shows snapshot of MD simulation for CO<sub>2</sub> – graphene sheets system without CNT with  $NVT$  constant at 300 K. The reservoir was filled with CO<sub>2</sub> gas molecules at 90 bar or at the density of 0.17 gram/cm<sup>3</sup>. The CO<sub>2</sub> molecules form solid ice structure at the

graphene sheets as shown in Figure S2-B.

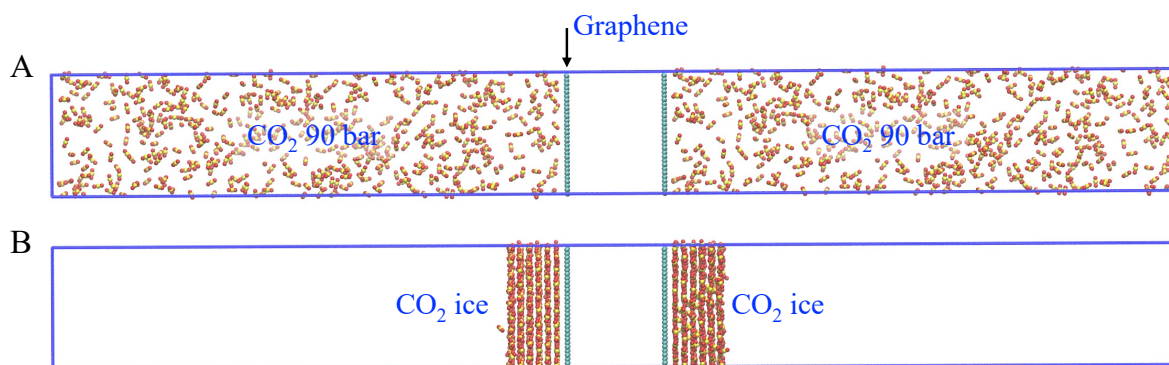

**Figure S2** MD simulation of CO<sub>2</sub> – graphene system: (A) Initial condition, the pressure of CO<sub>2</sub> gas in the reservoir is 90 bar, (B) The CO<sub>2</sub> forms solid ice at the graphene sheets.

Figure S3 shows simulation of bulk system of CO<sub>2</sub> gas molecules at 6 bar or at the density of 0.009 gram/cm<sup>3</sup>. The simulation was performed with *NVT* constant at 300 K. The result indicates that the CO<sub>2</sub> molecules form solid ice structure as shown in Figure S3-B. The decrease of potential energy shown in Figure S4 confirms the phase transition of the CO<sub>2</sub> molecules.

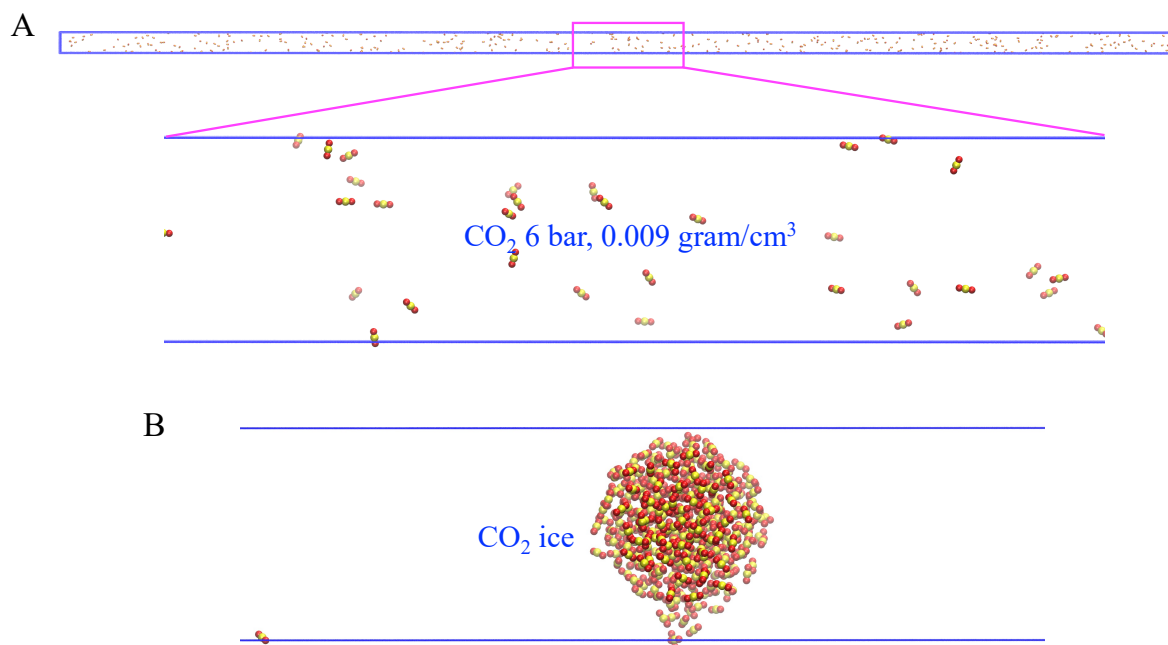

**Figure S3** Simulation of CO<sub>2</sub> bulk system: (A) Initial condition, CO<sub>2</sub> gas is at 6 bar, 0.009 gram/cm<sup>3</sup>, (B) The CO<sub>2</sub> forms solid ice structure.

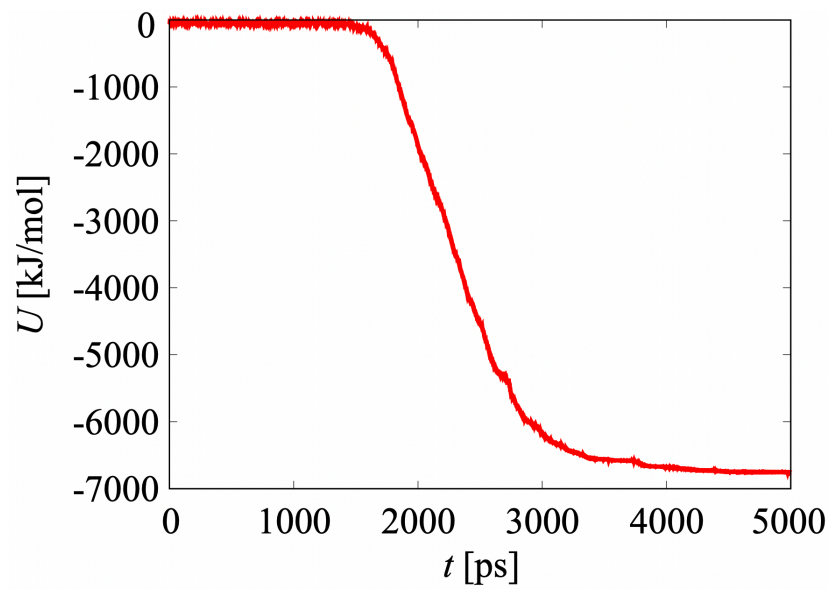

**Figure S4** Potential energy of the CO<sub>2</sub> bulk system. The energy decreases when the CO<sub>2</sub> gas forms solid ice structure.
